# Supplementary material for: Histone lactylation promotes malignant progression by facilitating USP39 expression to target PI3K/AKT/HIF-1α signal pathway in endometrial carcinoma
Source: Research Square preprint supplement (doi:10.21203/rs.3.rs-2439546/v1), 2023-01-18
Supplement: Supplementary file 1 [file 26e3a03fd67c722e388a1e36.docx]

Supplement Figure 1.


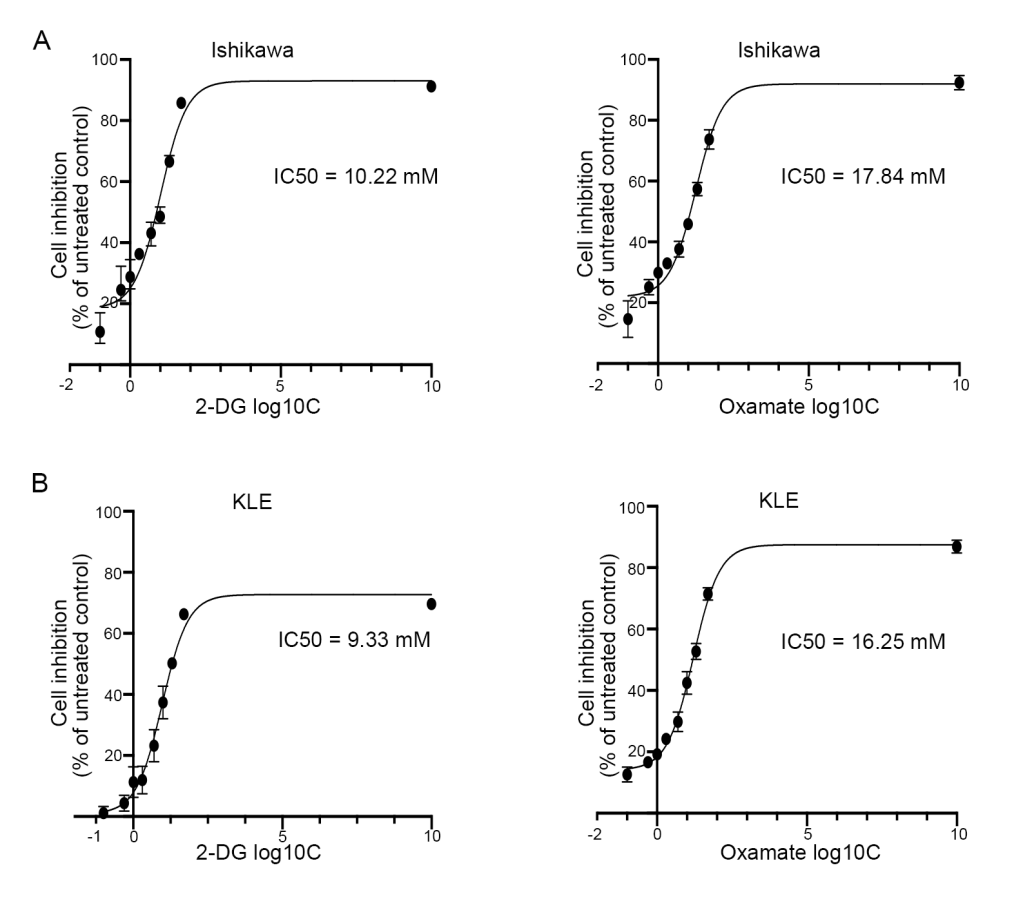


Half maximal inhibitory concentration (IC50) of 2-DG and oxamate in Ishikawa and KLE cells. (A) The IC50 of 2-DG and oxamate in Ishikawa cells. (B) The IC50 of 2-DG and oxamate in KLE cells.

Supplement Figure 2.


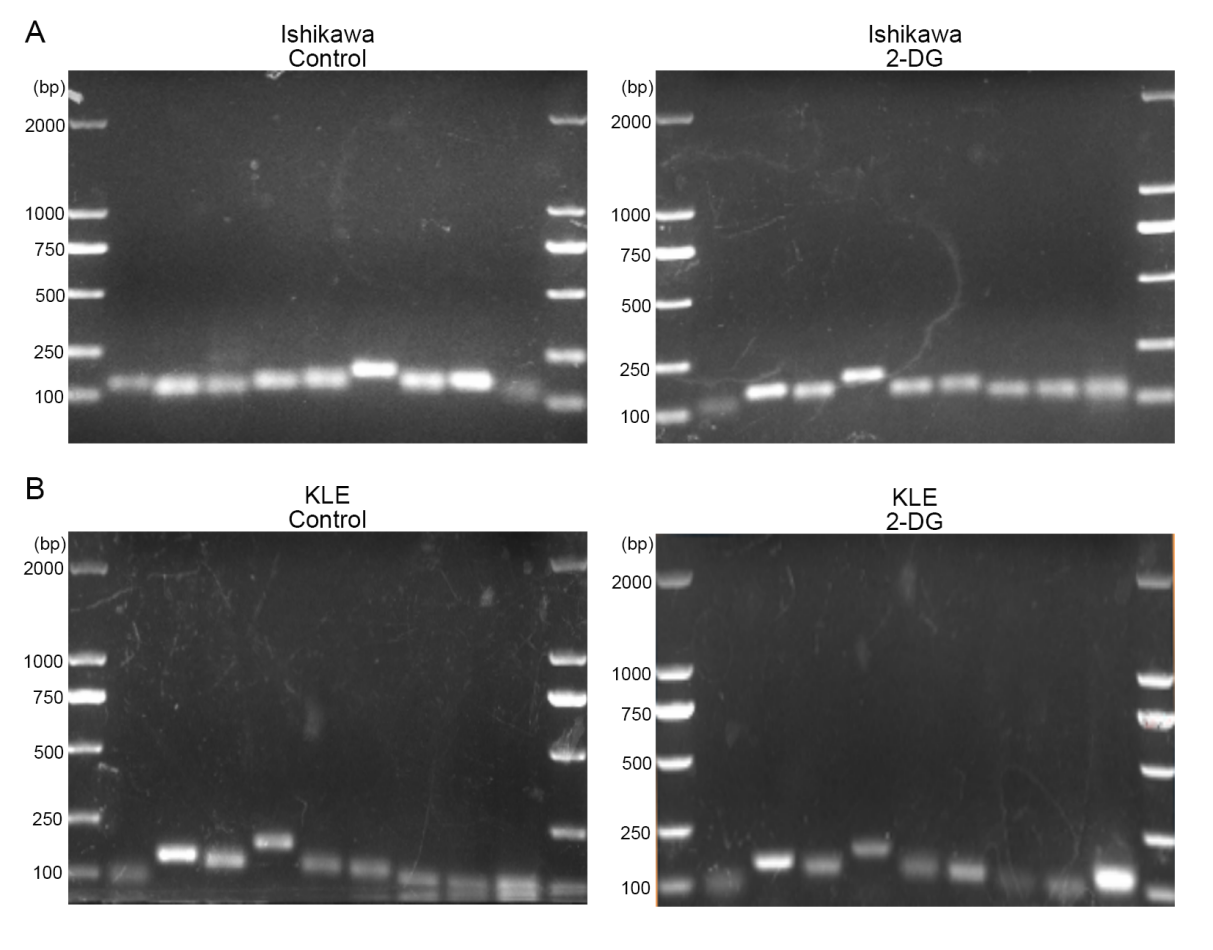


The productions of ChiP-qPCR are the length of 100~250 bp. (A) The DNA gel images about ChiP-qPCR productions of untreated Ishikawa and Ishikawa treated with 2-DG. (B) The DNA gel images about ChiP-qPCR productions of untreated KLE and KLE treated with 2-DG.

Supplementary Figure 3.


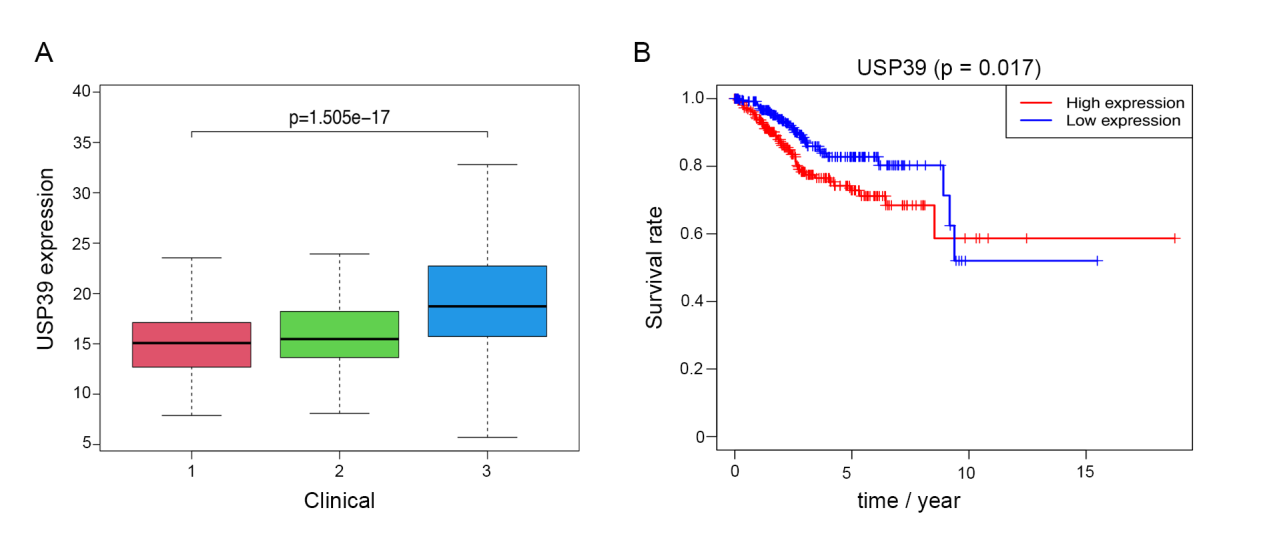


The analysis of TCGA database about USP39. (A) The expression of USP39 was positively correlated with EC clinical-grade (P<0.05). (B) Higher USP39 levels were associated with a poorer prognosis (P < 0.05).

Supplement Figure 4.


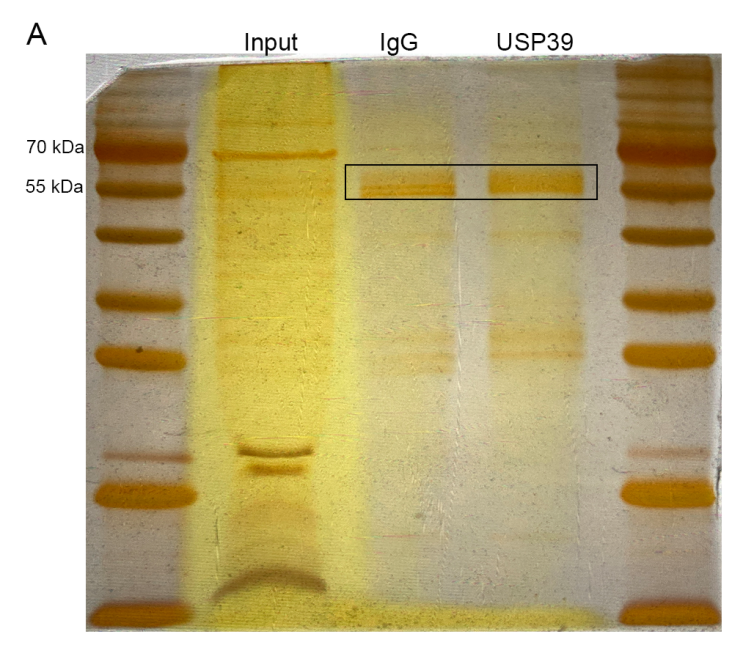


The image of sliver staining to identify the interacting proteins. (A) Co-IP sliver staining assay and spectrometry analysis assessed the potential proteins combined with USP39.
