# Supplementary figures and images for: Histone lactylation promotes malignant progression by facilitating USP39 expression to target PI3K/AKT/HIF-1α signal pathway in endometrial carcinoma
Source: Research Square preprint supplement (doi:10.21203/rs.3.rs-2439546/v1), 2023-01-18

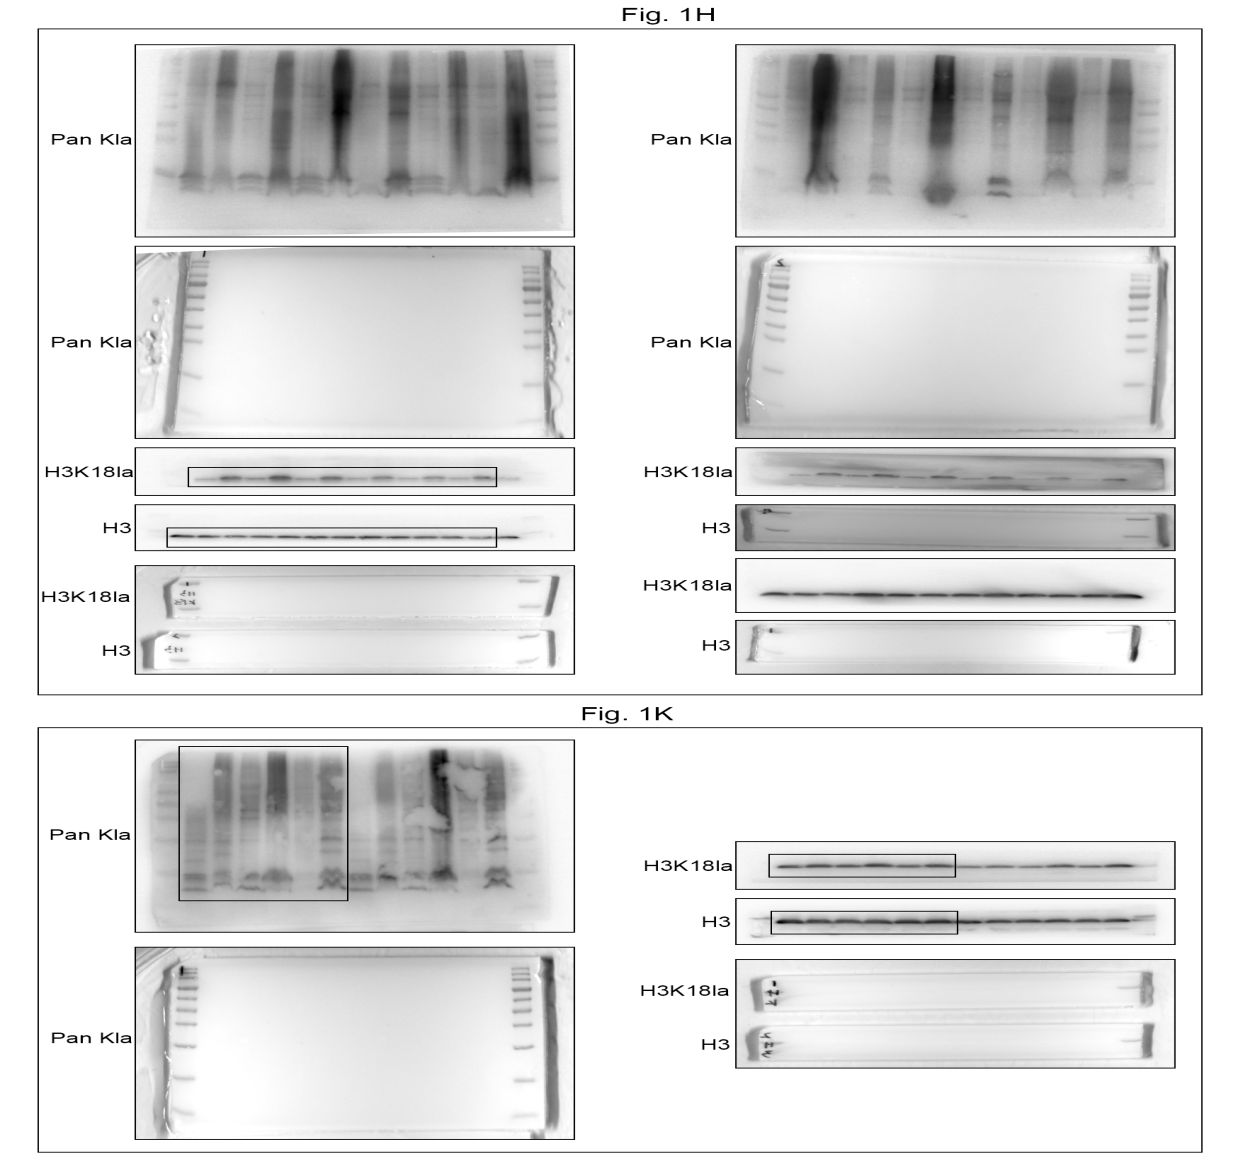


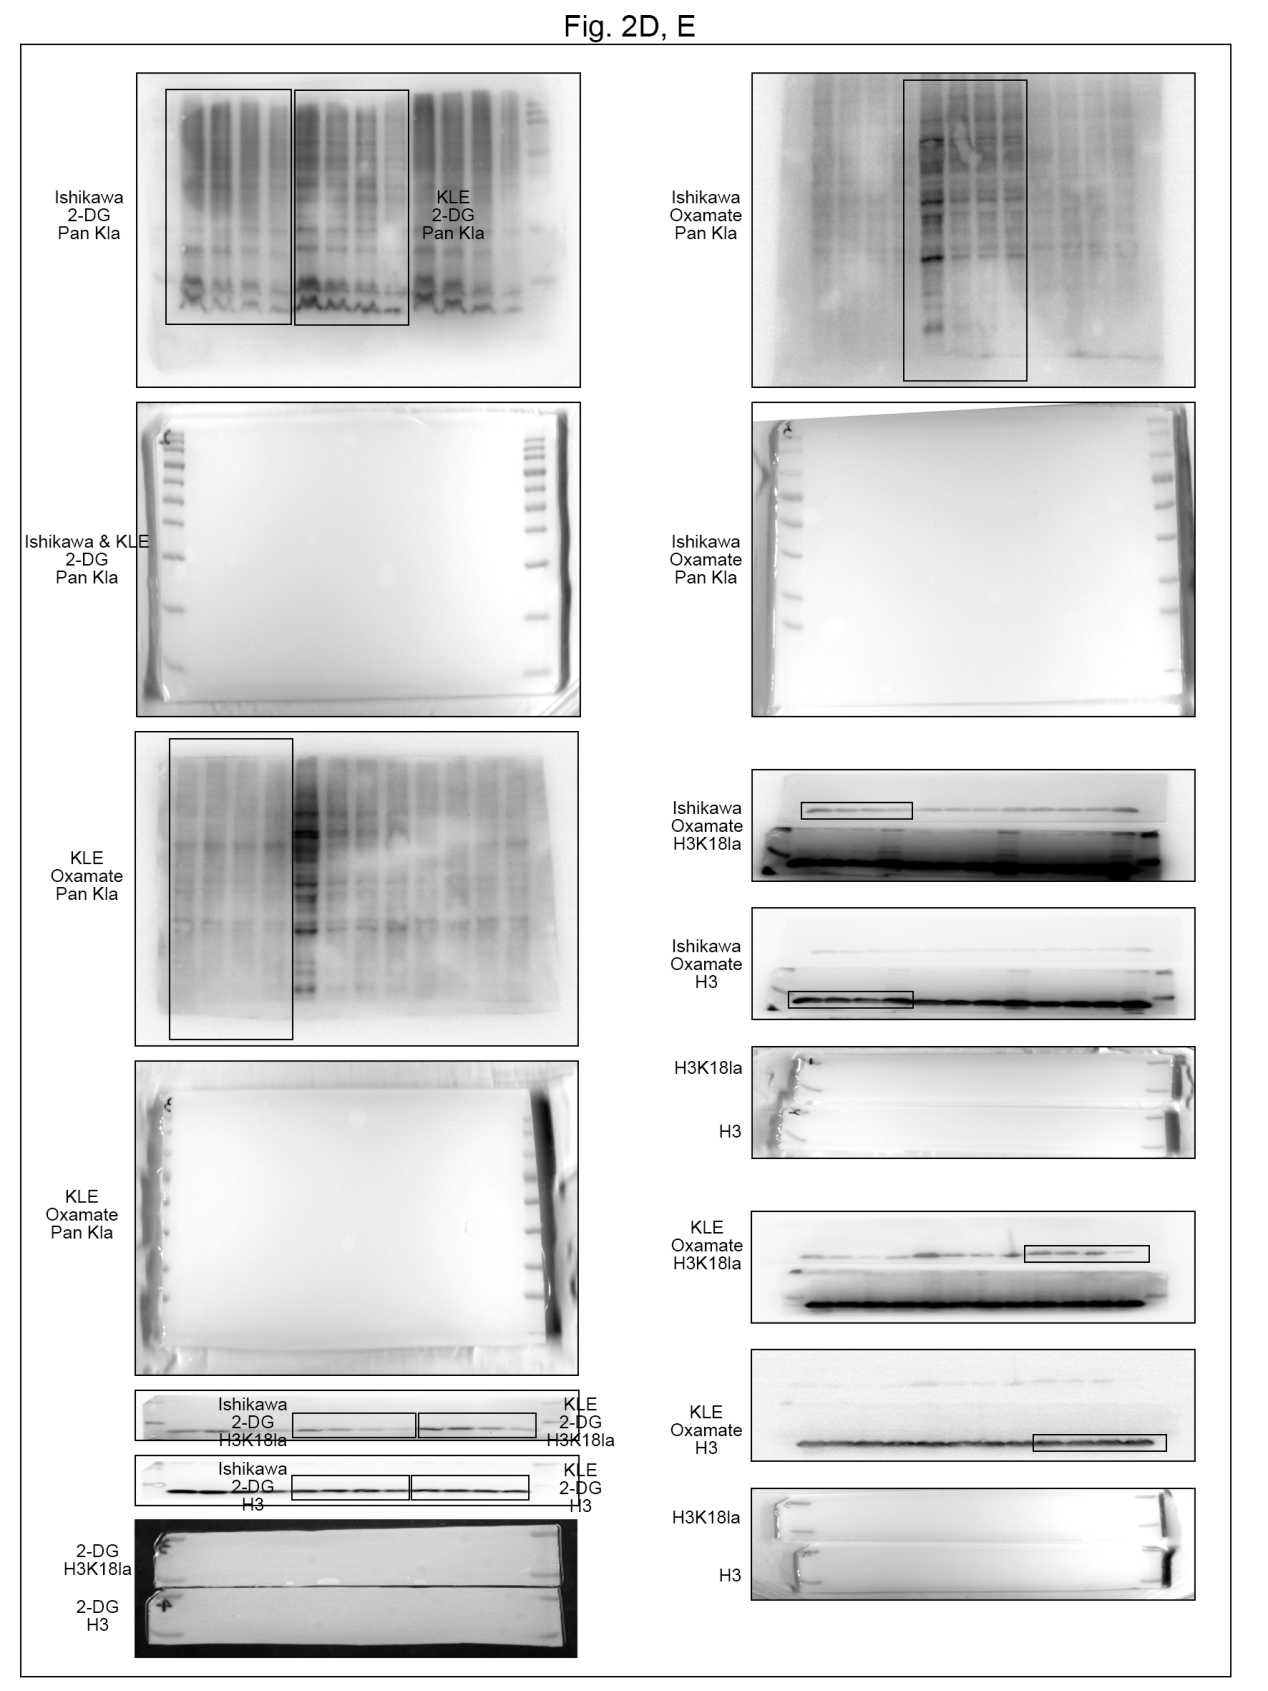


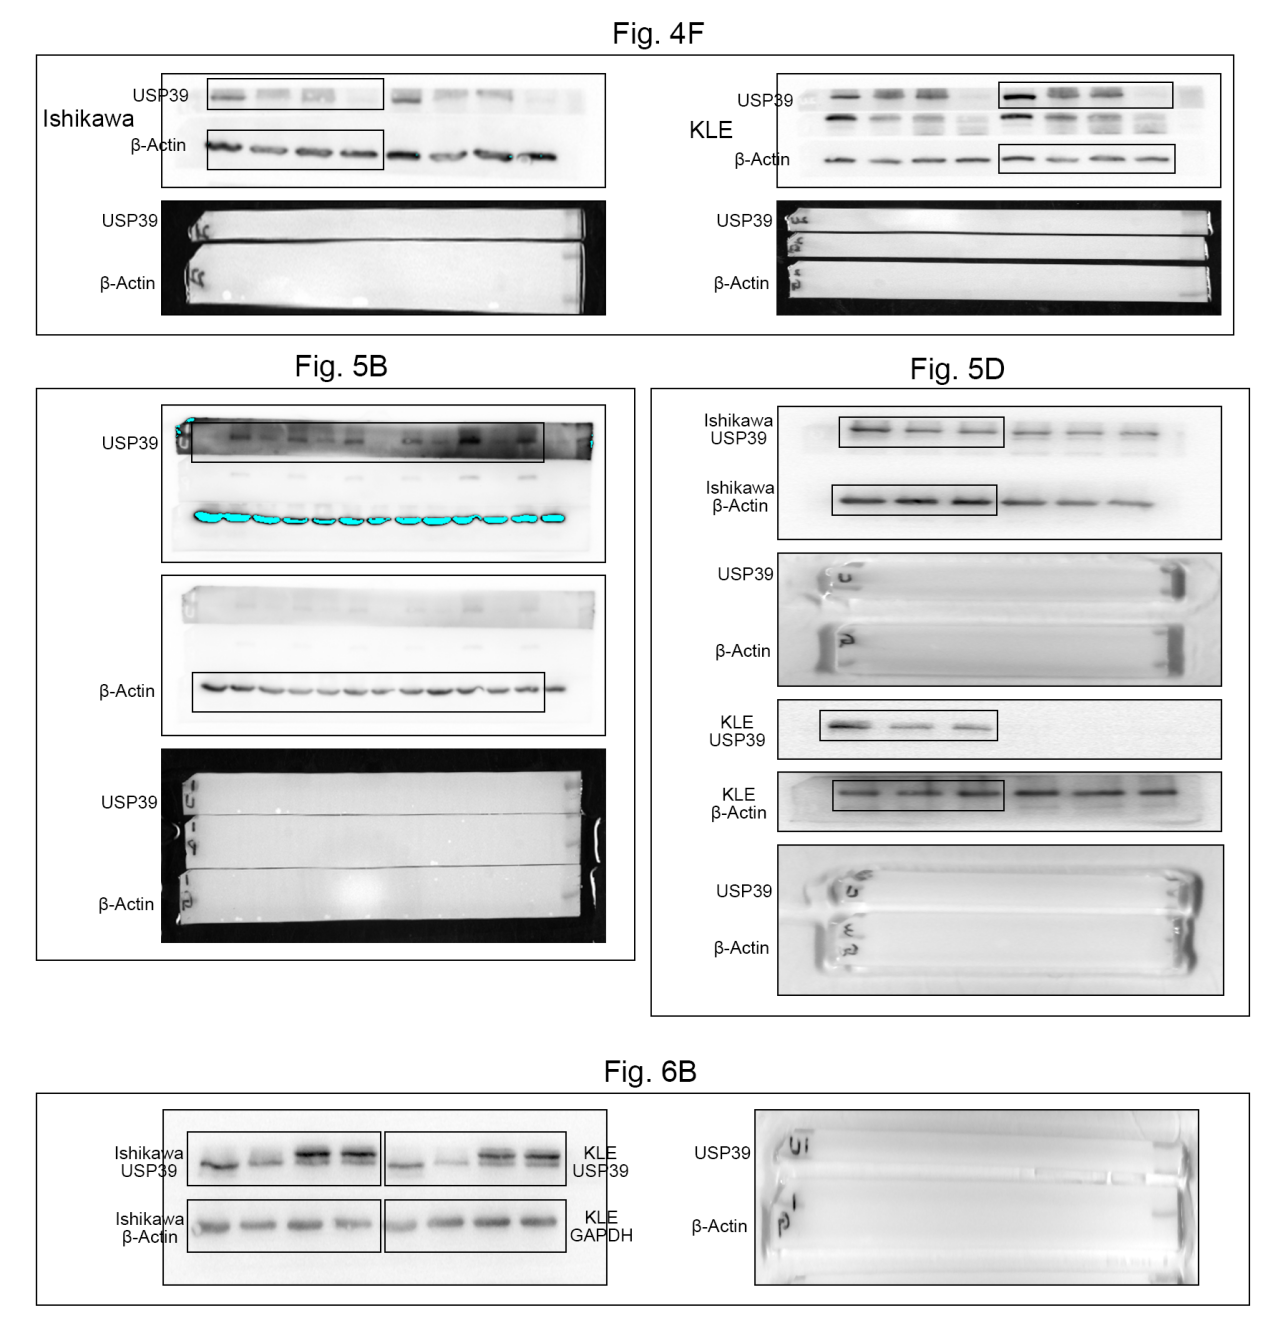


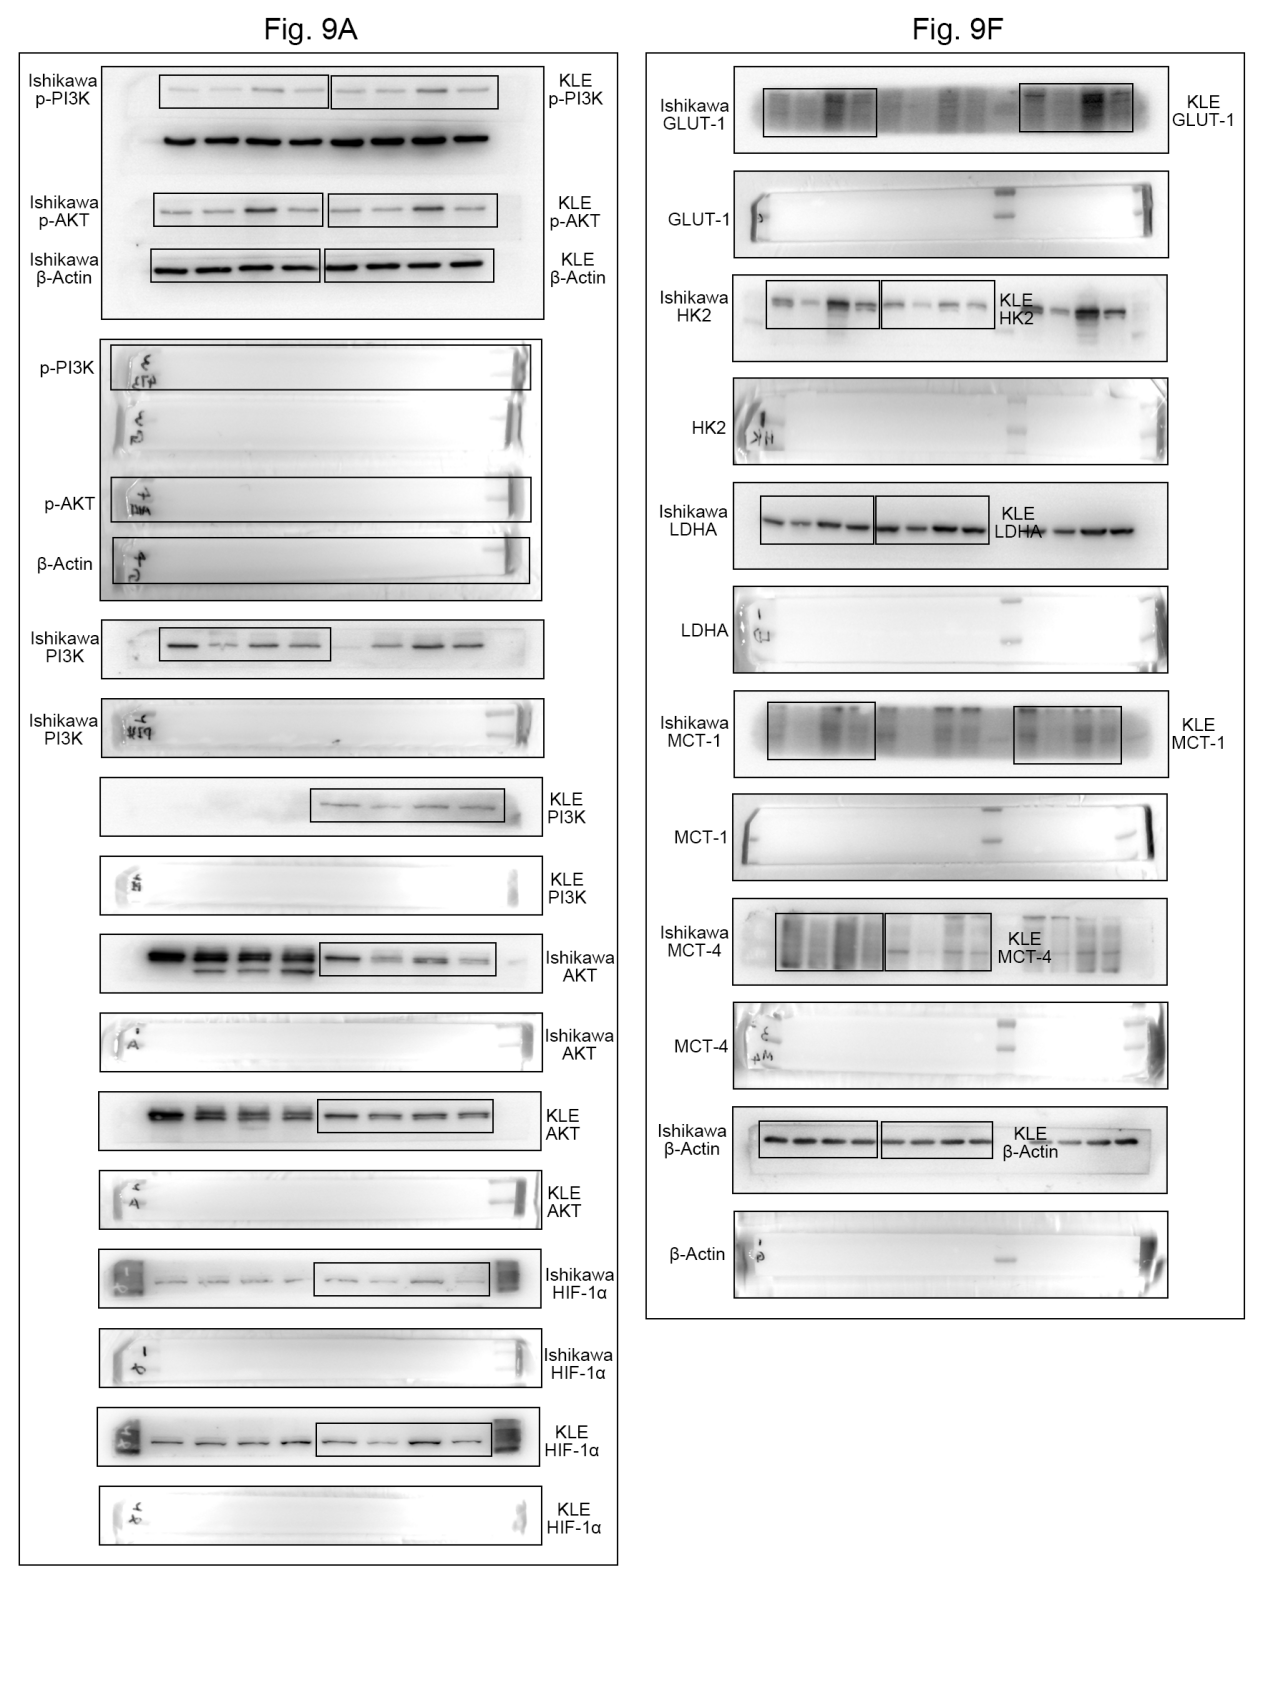


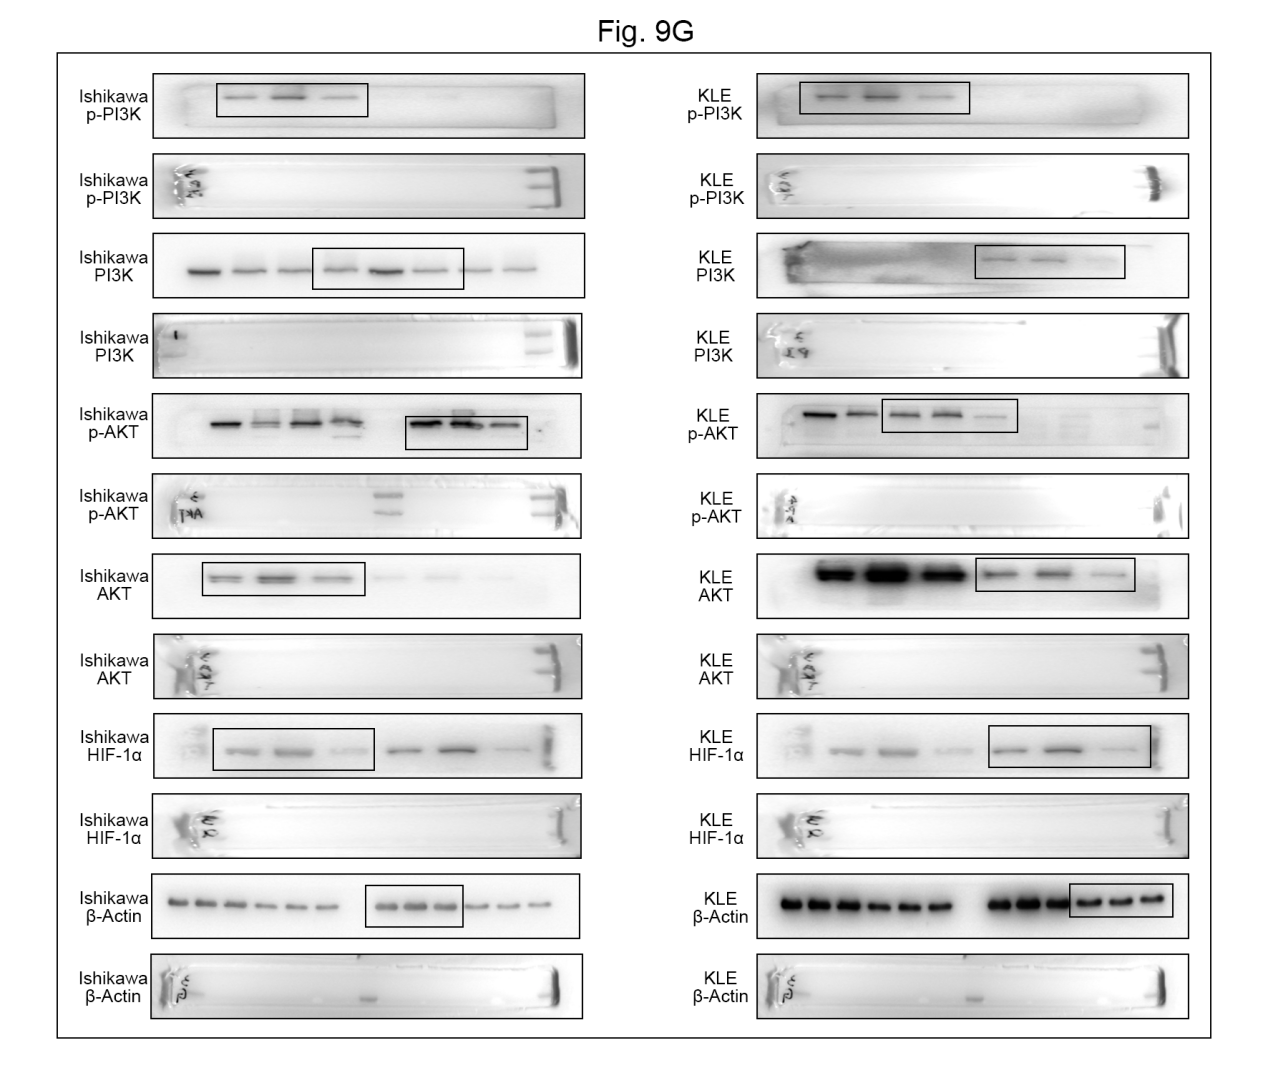


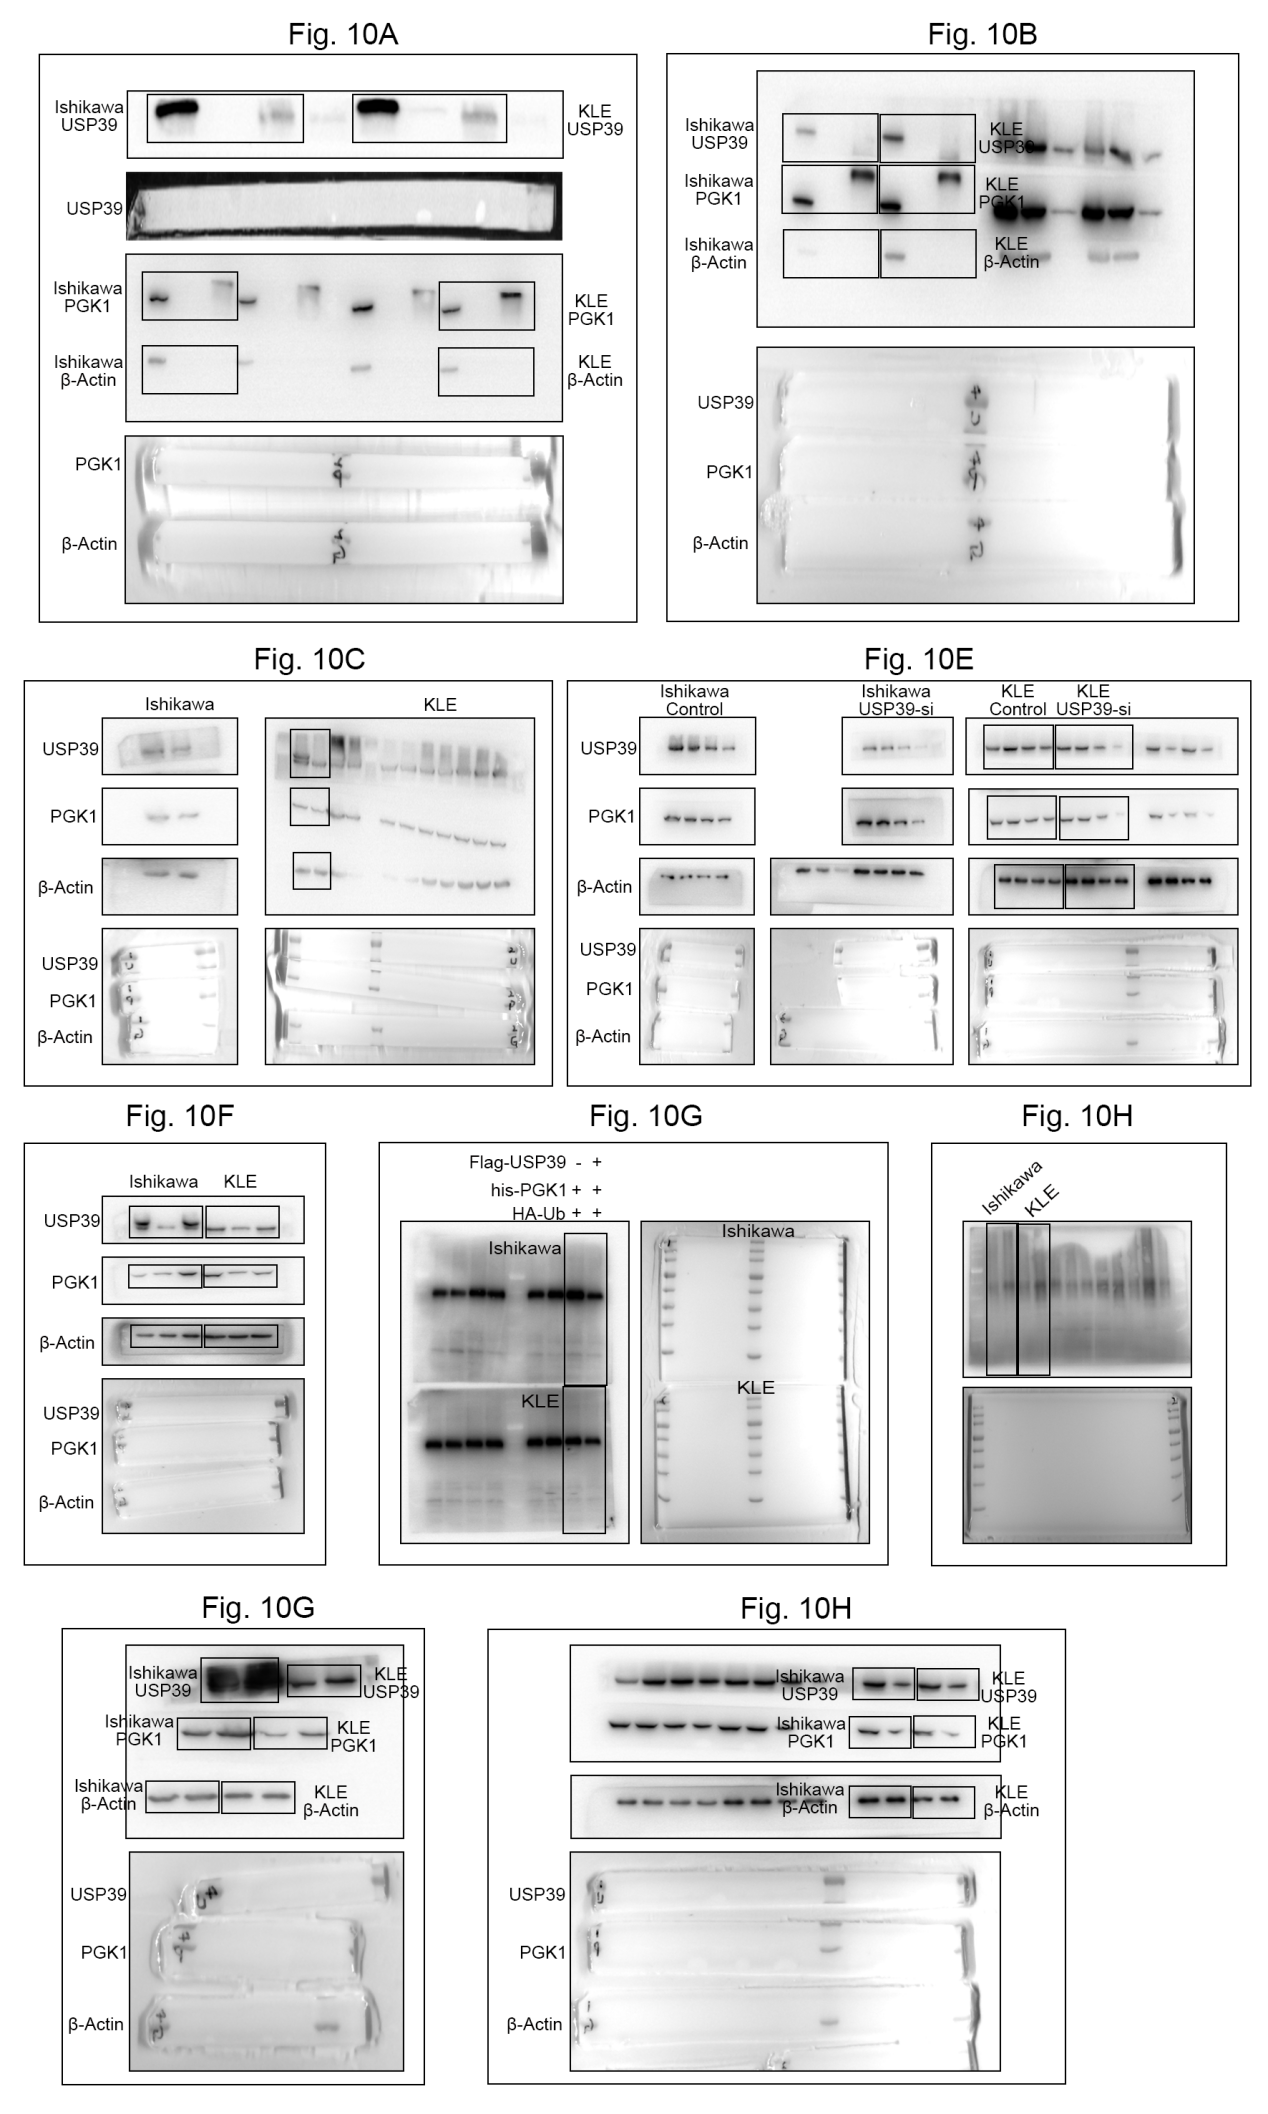


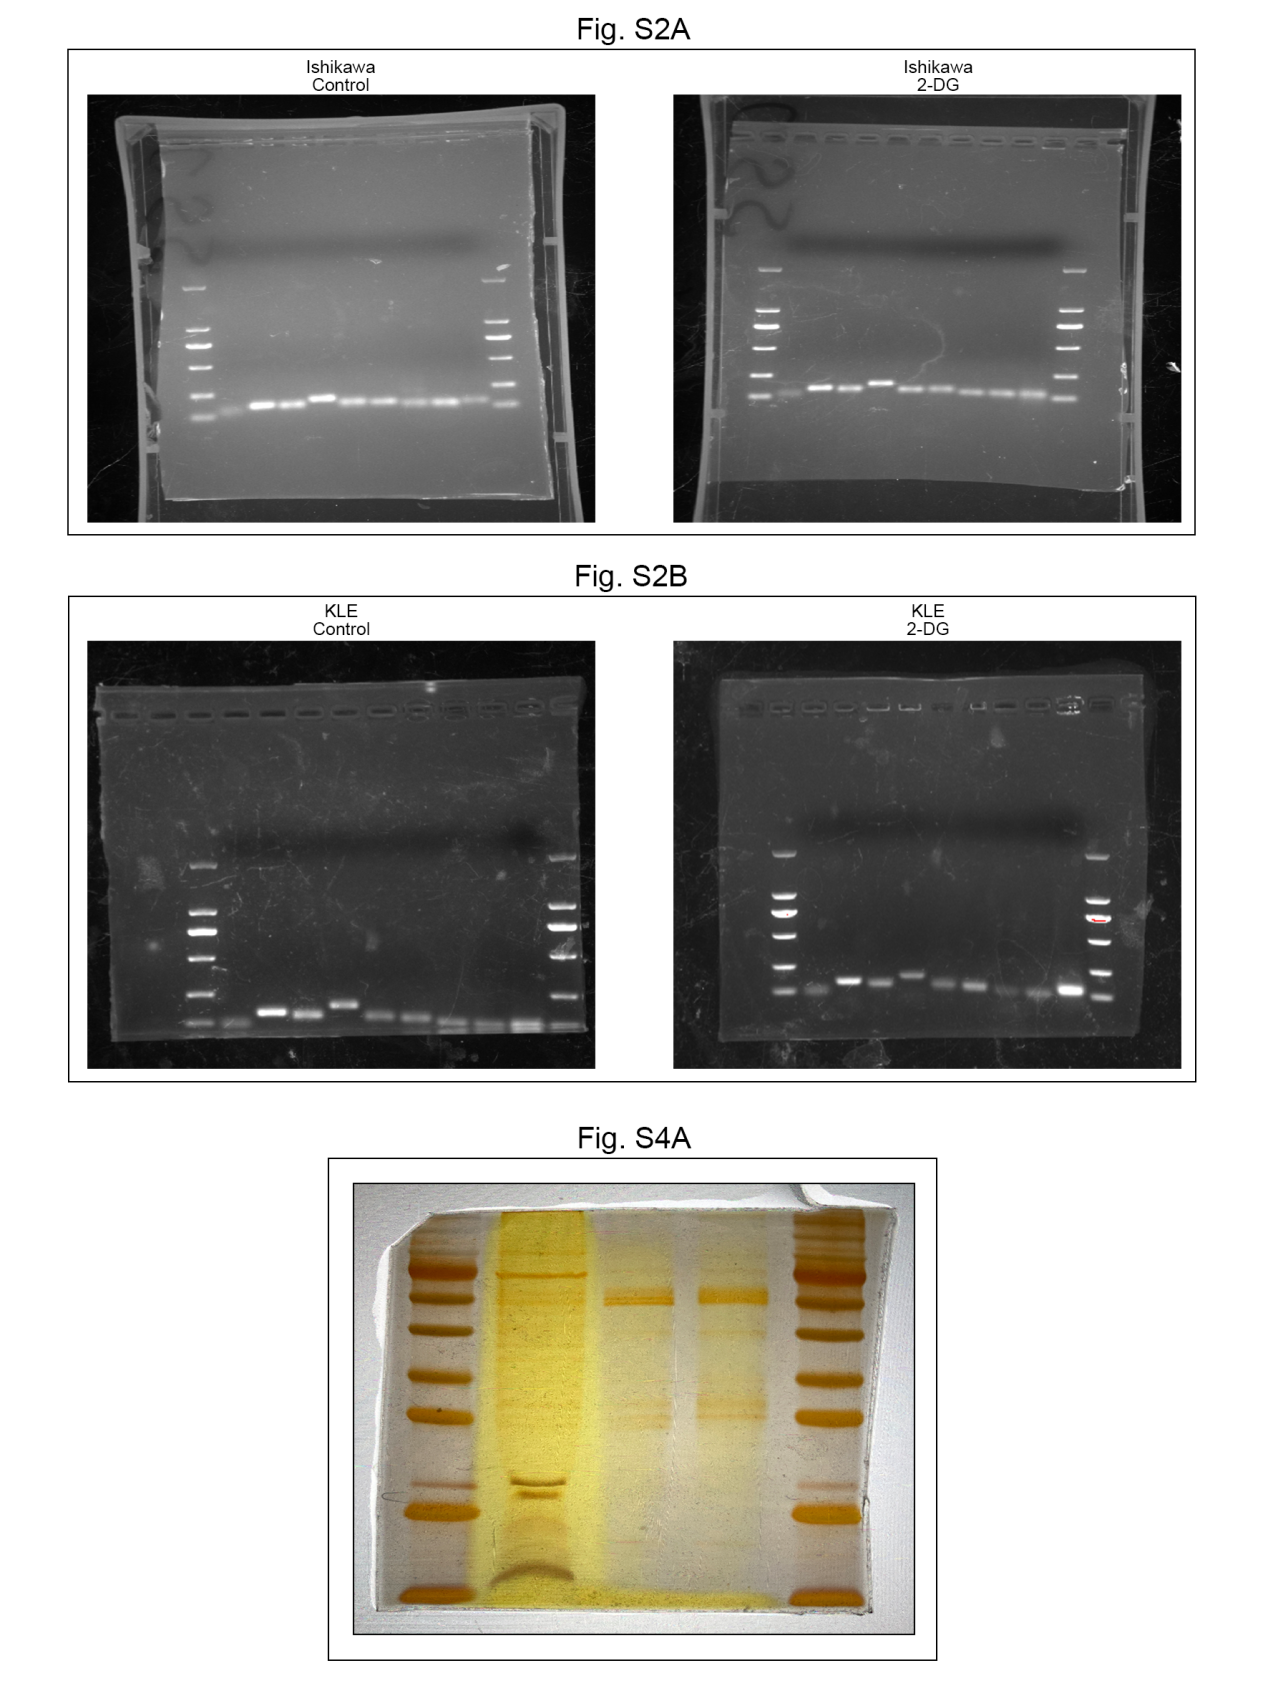

Supplement: Supplementary file 2 [file 296adc58e053c8e23577fbac.docx]
